# Supplementary material
Source: MDPI journal article supplement (https://www.mdpi.com/2227-9717/11/2/413)
Supplement: s1 [file s1 › processes-2146356-supplementary.pdf]

*Supplementary Materials*

# Mechanical Properties and Water Resistance of Magnesium Oxychloride Cement–Solidified Residual Sludge

Haiqiang Ma, Jiling Liang \*, Lu Wang, Han He, Wenwu Wang, Tingting Han, Ziting Xu and Jie Han

College of Civil Engineering, Liaoning Petrochemical University, Fushun 113001, China

\* Correspondence: l2j418@126.com; Tel.: +86-18341311292

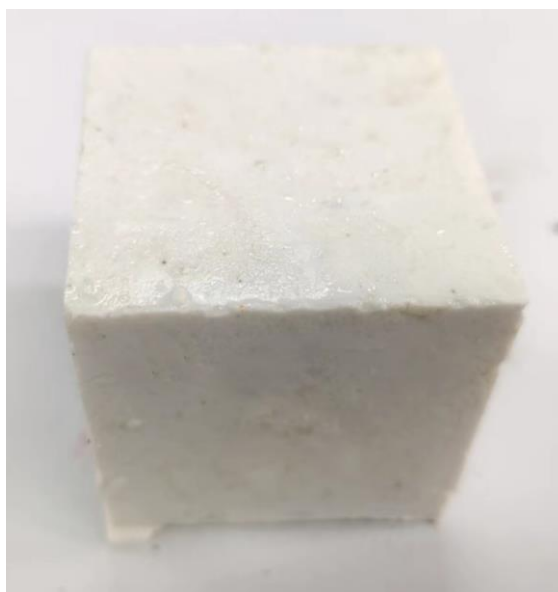

**Figure S1.** photos of the MOC solidified blocks when the  $R_n$  was 7.0 at  $R_{w/s}$  was 1.38.
